# Supplementary material
Source: PubMed Central journal article supplement (PMC8464511)
Supplement: NIHMS1729950-supplement-1.pdf [file NIHMS1729950-supplement-1.pdf]

14  
15  
16  
17  
18  
19  
20  
21  
22  
23  
24  
25  
26  
27  
28  
29  
30  
31  
32  
33  
34  
35  
36  
37  
38  
39  
40  
41  
42  
43  
44  
45  
46  
47  
48  
49  
50  
51  
52  
53  
54  
55  
56  
57  
58  
59  
60  
61  
62  
63  
64  
65

## SUPPLEMENTS

### Supplement A: Analysis variables by study

|                        | NHBS                  |                                                                                         | OR-HOPE               |                                                                                         |
|------------------------|-----------------------|-----------------------------------------------------------------------------------------|-----------------------|-----------------------------------------------------------------------------------------|
| Measure                | Variable (time frame) | Type/Options                                                                            | Variable (time frame) | Type/Options                                                                            |
| <i>Outcome</i>         |                       |                                                                                         |                       |                                                                                         |
| Currently own naloxone | nalown                | 0 = No<br>1 = Yes                                                                       | nalownrc              | 0 = No<br>1 = Yes                                                                       |
| <i>Predictors</i>      |                       |                                                                                         |                       |                                                                                         |
| Age                    | age                   | Continuous                                                                              | scrage                | Continuous                                                                              |
| Race/Ethnicity         | raceeth               | 1 = White – NH<br>2 = Black – NH<br>3 = Hispanic<br>4 = Multiple - NH<br>5 = Other - NH | raceeth               | 1 = White – NH<br>2 = Black – NH<br>3 = Hispanic<br>4 = Multiple - NH<br>5 = Other - NH |
|                        | poc                   | 0 = White<br>1 = Non-white                                                              | poc                   | 0 = White<br>1 = Non-white                                                              |
| Sex                    | gender                | 1 = Male<br>2 = Female<br>3 = Transgender                                               | scrngen               | 1 = Male<br>2 = Female<br>3 = Transgender                                               |
| Education              | hs                    | 0 = HS or less<br>1 = Beyond HS                                                         | hs                    | 0 = HS or less<br>1 = Beyond HS                                                         |
| Homelessness           | homeless (12 mos)     | 0 = No<br>1 = Yes                                                                       | demhomel (6 mos)      | 0 = No<br>1 = Yes                                                                       |
| Criminal justice       | held12m (12 mos)      | 0 = No<br>1 = Yes                                                                       | held6m (6 mos)        | 0 = No<br>1 = Yes                                                                       |
| Health insurance       | insured (current)     | 0 = No/DK<br>1 = Yes                                                                    | insured (current)     | 0 = No/DK<br>1 = Yes                                                                    |
| Insurance type         | medicaid              | 0 = No insurance/DK<br>1 = Medicaid<br>2 = Other insurance                              | medicaid              | 0 = No insurance/DK<br>1 = Medicaid<br>2 = Other insurance                              |

14  
15  
16  
17  
18  
19  
20  
21  
22  
23  
24  
25  
26  
27  
28  
29  
30  
31  
32  
33  
34  
35  
36  
37  
38  
39  
40  
41  
42  
43  
44  
45  
46  
47  
48  
49  
50  
51  
52  
53  
54  
55  
56  
57  
58  
59  
60  
61  
62  
63  
64  
65

|                               | <b>NHBS</b>                                                                                            |                                                                                                | <b>OR-HOPE</b>                                                                                  |                                                                    |
|-------------------------------|--------------------------------------------------------------------------------------------------------|------------------------------------------------------------------------------------------------|-------------------------------------------------------------------------------------------------|--------------------------------------------------------------------|
| <b>Measure</b>                | <b>Variable (time frame)</b>                                                                           | <b>Type/Options</b>                                                                            | <b>Variable (time frame)</b>                                                                    | <b>Type/Options</b>                                                |
| Drug of choice                | usualdrugrc (current)<br><i>generated from e_usinj:</i><br><i>Which drug do you inject most often?</i> | 1 = Heroin<br>2 = Methamphetamine<br>3 = Cocaine<br>4 = Goofball<br>5 = Speedball<br>6 = Other | usualdrugrc (current)<br><i>generated from subdrch: Currently, what is your drug of choice?</i> | 1 = Heroin<br>2 = Methamphetamine<br>3 = Cocaine<br>4 = Other      |
| Frequency of injection        | injfx12 (12 mos)                                                                                       | 1 = >1x/day<br>2 = 1x/day<br>3 = >1x/wk<br>4 = <1x/wk                                          | injfx30d (30 days)                                                                              | 1 = >1x/day<br>2 = 1x/day<br>3 = >1x/wk<br>4 = <1x/wk<br>5 = never |
| Sterile needles from SSP      | ssp12m (12 mos)                                                                                        | 0 = No<br>1 = Yes                                                                              | ssp30d (30 days)                                                                                | 0 = No<br>1 = Yes                                                  |
| Sterile needles from pharmacy | phar12m (12 mos)                                                                                       | 0 = No<br>1 = Yes                                                                              | phar30d (30 days)                                                                               | 0 = No<br>1 = Yes                                                  |
| Witnessing OD                 | od12 (12 mos)                                                                                          | 0 = No<br>1 = Yes                                                                              | ovdevwit (ever)                                                                                 | 0 = No<br>1 = Yes                                                  |
| Experiencing OD               | overdose (12 mos)                                                                                      | 0 = No<br>1 = Yes                                                                              | overdose (12 mos)                                                                               | 0 = No<br>1 = Yes                                                  |
| Overdose training             | odtrain (ever)                                                                                         | 0 = No<br>1 = Yes                                                                              | odtrainrc (ever)                                                                                | 0 = No/Don't know<br>1 = Yes                                       |
